# Supplementary material for: Natural killer-cell counts are associated with molecular relapse-free survival after imatinib discontinuation in chronic myeloid leukemia: the IMMUNOSTIM study
Source: PubMed Central journal article supplement — Haematologica. 2017 May 18;102(8):1368–77. doi: 10.3324/haematol.2017.165001 (PMC6643734; doi:10.3324/haematol.2017.165001), 2017-08

## Natural killer-cell counts are associated with molecular relapse-free survival after imatinib discontinuation in chronic myeloid leukemia: the IMMUNOSTIM study

Delphine Rea,<sup>1,2,3\*</sup> Guylaine Henry,<sup>4</sup> Zena Khaznadar,<sup>1,5</sup> Gabriel Etienne,<sup>3,6</sup> François Guilhot,<sup>3,7</sup> Franck Nicolini,<sup>3,8</sup> Joelle Guilhot,<sup>3,7</sup> Philippe Rousselot,<sup>3,9</sup> Françoise Huguet,<sup>3,10</sup> Laurence Legros,<sup>3,11</sup> Martine Gardembas,<sup>3,12</sup> Viviane Dubruille,<sup>3,13</sup> Agnès Guerci-Bresler,<sup>3,14</sup> Aude Charbonnier,<sup>3,15</sup> Frédéric Maloisel,<sup>16</sup> Jean-Christophe Ianotto,<sup>17</sup> Bruno Villemagne,<sup>18</sup> François-Xavier Mahon,<sup>3,6</sup> Hélène Moins-Teisserenc,<sup>1,4,5</sup> Nicolas Dulphy<sup>1,4,5\*</sup> and Antoine Toubert<sup>1,4,5</sup>

<sup>1</sup>INSERM UMRS-1160, Paris; <sup>2</sup>Service d'Hématologie Adulte, Hôpital Saint-Louis, Paris; <sup>3</sup>France Intergroupe des Leucémies Myéloïdes Chroniques (Fi-LMC), Institut Bergonié, Bordeaux; <sup>4</sup>Laboratoire d'Immunologie et Histocompatibilité, Hôpital Saint-Louis, Paris; <sup>5</sup>Institut Universitaire d'Hématologie, Université Paris Diderot-Paris 7; <sup>6</sup>Service d'Oncologie Médicale, Institut Bergonié, Bordeaux; <sup>7</sup>INSERM CIC 1402, CHU de Poitiers; <sup>8</sup>Service d'Hématologie Clinique, CHU Lyon Sud, Pierre Bénite; <sup>9</sup>Service d'Hématologie Oncologie et INSERM UMR-1173, Centre Hospitalier de Versailles, Le Chesnay; <sup>10</sup>Service d'Hématologie, IUCT Oncopole, Toulouse; <sup>11</sup>Service d'Hématologie Clinique, Hôpital de l'Archet, CHU de Nice; <sup>12</sup>Service des Maladies du Sang, CHRU Angers; <sup>13</sup>Service d'Hématologie Clinique, Hôpital Hôtel Dieu, Nantes; <sup>14</sup>Service d'Hématologie, CHU Brabois, Vandoeuvre les Nancy; <sup>15</sup>Service d'Onco-Hématologie, Institut Paoli Calmettes, Marseille; <sup>16</sup>Groupe Oncologie-Maladies du Sang, Clinique Sainte Anne, Strasbourg; <sup>17</sup>Service Hématologie Clinique, Hôpital Morvan, CHRU de Brest and <sup>18</sup>Service Médecine Onco-hématologie, CH de la Roche sur Yon, France

\*DR and ND contributed equally to this work.

©2017 Ferrata Storti Foundation. This is an open-access paper. doi:10.3324/haematol.2017.165001

Received: January 21, 2017.

Accepted: May 8, 2017.

Pre-published: May 18, 2017.

Correspondence: delphine.rea@aphp.fr or nicolas.dulphy@univ-paris-diderot.fr

## Online Supplement

### Supplementary Methods

#### *Immunophenotyping*

To analyze T-cells, NK-cells and their subsets by flow cytometry, a 4-color staining of fresh blood was performed followed by red blood cell lysis. Leucocytes were acquired with a BD Biosciences a FACSCalibur™ and data were analyzed with the BD CellQuest software. PerCP-CD3 (clone SK7), PerCP-CD4 (clone SK3), PE-CD4 (clone SK3), PerCP-CD8 (clone SK1), PE-CD8 (clone SK1), APC-CD45RA (clone HI100), PE-CD27 (clone M-T271), APC-CD56 (clone B159), FITC-CD25 (clone 2A3) and FITC-CD16 (clone 3G8) were from BD Biosciences. FITC-CCR7 (clone 150503) was from R&D Systems). PE-CD127 (clone R34), and PE-NKG2D (clone ON72) were from Beckman Coulter. To analyze NK-receptor expression by flow cytometry on thawed PBMCs, an 8-color staining with mAb was performed, leucocytes were acquired with a BD Biosciences FACSCanto™ II and data were analyzed with the DIVA v6.1.3 software. FITC-DNAM-1 (clone DX11), APC-H7-CD3 (clone SK7) and PercP-Cy5.5-CD56 (clone B159) were from BD Biosciences. PE-KIR2D (clone NKVFS1), PE-NKp30 (clone AF29-4D12), APC-NKp46 (clone 9E2) and Vioblue-CD57 (clone TB03) were from Miltenyi Biotec. PE-Cy7-NKG2A (clone Z199) and APC-CD94 (clone HP-3B1) were from Beckman Coulter. BV510-CD16 (clone 3G8) was from Ozyme.

#### *NK-cell functional assays*

To analyze CD107a and CD137 expression by flow cytometry on CD3<sup>+</sup>CD56<sup>+</sup> NK-cells in a degranulation assay, leucocytes stained with mAbs were acquired with a BD Biosciences FACSCanto™ II and data were analyzed with the DIVA v6.1.3 software. APC-

CD137 (clone 4B4-1), PE-Cy7-CD56 (clone B159) and APC-H7-CD3 (clone SK7) were from BD Biosciences and BV510-CD16 (clone 3G8) was from Ozyme). For IFN- $\gamma$  detection by flow cytometry in CD56<sup>bright</sup> NK-cells after cytokine stimulation, IFN- $\gamma$  intracellular staining was performed using the AlexaFluor488-labelled B27 clone (BD Biosciences). Leucocytes were acquired with a BD Biosciences FACSCanto™ II and data were analyzed with the DIVA v6.1.3 software.

**Supplementary Table S1. Leucocytes, lymphocytes and T-cell subsets at baseline**

| Parameters                                                                        | All<br>(n=51)    | Non-relapsing<br>(n=23) | Relapsing<br>(n=28) | p value* |
|-----------------------------------------------------------------------------------|------------------|-------------------------|---------------------|----------|
| <b>Leucocytes/mm<sup>3</sup></b>                                                  | 4820 (2550-7860) | 5020 (2550-7470)        | 4800 (3400-7860)    | 0.557    |
| <b>Lymphocytes/mm<sup>3</sup></b>                                                 | 1310 (720-2610)  | 1400 (810-2610)         | 1300 (720-1970)     | 0.185    |
| <b>CD3<sup>+</sup> T-cells/mm<sup>3</sup></b>                                     | 897 (315-1949)   | 896 (543-1949)          | 898 (315-1576)      | 0.172    |
| CD3 <sup>+</sup> CD4 <sup>+</sup> /mm <sup>3</sup>                                | 534 (228-1248)   | 534 (352-1248)          | 538 (228-1021)      | 0.297    |
| CD3 <sup>+</sup> CD8 <sup>+</sup> /mm <sup>3</sup>                                | 279 (72-998)     | 295 (77-998)            | 276 (72-562)        | 0.092    |
| Ratio CD4/CD8                                                                     | 2.02 (0.5-14.2)  | 1.93 (0.5-5.94)         | 2.09 (0.79-14.2)    | 0.489    |
| <b>CD3<sup>+</sup>CD4<sup>+</sup> subsets</b>                                     |                  |                         |                     |          |
| Naïve (CD4 <sup>+</sup> CD45RA <sup>+</sup> CCR7 <sup>+</sup> CD27 <sup>+</sup> ) |                  |                         |                     |          |
| % CD4 <sup>+</sup>                                                                | 35.1 (8.7-75.9)  | 35.5 (13.1-57.7)        | 34.7 (8.7-75.9)     | 0.949    |
| /mm <sup>3</sup>                                                                  | 200 (32-774)     | 189 (82-286)            | 213 (32-774)        | 0.949    |
| Central memory (CD4 <sup>+</sup> CD45RA <sup>-</sup> CCR7 <sup>+</sup> )          |                  |                         |                     |          |
| % CD4 <sup>+</sup>                                                                | 45.1 (19.8-74.7) | 46.7 (25.1-74.7)        | 44.3 (19.8-64.6)    | 0.339    |
| /mm <sup>3</sup>                                                                  | 259 (80-570)     | 289 (120-570)           | 223 (80-394)        | 0.091    |
| Effector memory (CD4 <sup>+</sup> CD45RA <sup>-</sup> CCR7 <sup>-</sup> )         |                  |                         |                     |          |
| % CD4 <sup>+</sup>                                                                | 15.7 (2.4-53)    | 13.6 (9.3-29.3)         | 18.9 (2.4-53)       | 0.171    |
| /mm <sup>3</sup>                                                                  | 91 (25-273)      | 97 (41-273)             | 85 (25-232)         | 0.974    |
| Regulatory (CD4 <sup>+</sup> CD25 <sup>+</sup> CD127 <sup>low/-</sup> )           |                  |                         |                     |          |
| % CD4 <sup>+</sup>                                                                | 7 (1.2-13.1)     | 7.1 (1.2-12.1)          | 6.4 (3.2-13.1)      | 0.300    |
| /mm <sup>3</sup>                                                                  | 37 (4-94)        | 40 (4-94)               | 36 (12-53)          | 0.136    |
| <b>CD3<sup>+</sup> CD8<sup>+</sup> subsets</b>                                    |                  |                         |                     |          |
| Naïve (CD8 <sup>+</sup> CD45RA <sup>+</sup> CCR7 <sup>+</sup> CD27 <sup>+</sup> ) |                  |                         |                     |          |
| % CD8 <sup>+</sup>                                                                | 26.2 (6.5-71.9)  | 23.7 (6.5-62.7)         | 28 (7.5-71.9)       | 0.841    |
| /mm <sup>3</sup>                                                                  | 75 (9-239)       | 75 (28-239)             | 72 (9-236)          | 0.342    |
| Central memory (CD8 <sup>+</sup> CD45RA <sup>-</sup> CCR7 <sup>+</sup> )          |                  |                         |                     |          |
| % CD8 <sup>+</sup>                                                                | 12 (1-38.6)      | 13.4 (1-23.7)           | 11.1 (2-38.6)       | 0.920    |
| /mm <sup>3</sup>                                                                  | 30 (2-113)       | 38 (2-110)              | 29 (6-113)          | 0.367    |
| Effector memory (CD8 <sup>+</sup> CD45RA <sup>-</sup> CCR7 <sup>-</sup> )         |                  |                         |                     |          |
| % CD8 <sup>+</sup>                                                                | 24.2 (1.6-58.3)  | 20.7 (1.6-58.3)         | 27.9 (3.2-55.7)     | 0.325    |
| /mm <sup>3</sup>                                                                  | 61 (4-345)       | 64 (4-345)              | 56 (9-237)          | 0.972    |
| Effector memory (CD8 <sup>+</sup> CD45RA <sup>+</sup> CCR7 <sup>-</sup> )         |                  |                         |                     |          |
| % CD8 <sup>+</sup>                                                                | 33.3 (6.8-84.6)  | 38.8 (2-110)            | 33 (6.8-58.7)       | 0.494    |
| /mm <sup>3</sup>                                                                  | 108 (9-416)      | 111 (20-416)            | 85 (9-271)          | 0.211    |

\*The Mann-Whitney U test was used to compare variables from non-relapsing and relapsing patients, with a level of significance of 0.05. Median values (min-max) are shown.

## **Supplementary Figure S1**

**Figure S1. NK-cell receptor and function after imatinib discontinuation.** (A-F) NK-cell receptor expression, (G) degranulation capacities, (H) activation marker expression and (I) IFN- $\gamma$  production at baseline and after imatinib discontinuation in non-relapsing (n=6) and relapsing patients (n=6). Scatter dot plots with median are shown. P values (by Wilcoxon matched-pairs signed ranked test) are shown for each set of data.

Figure S1

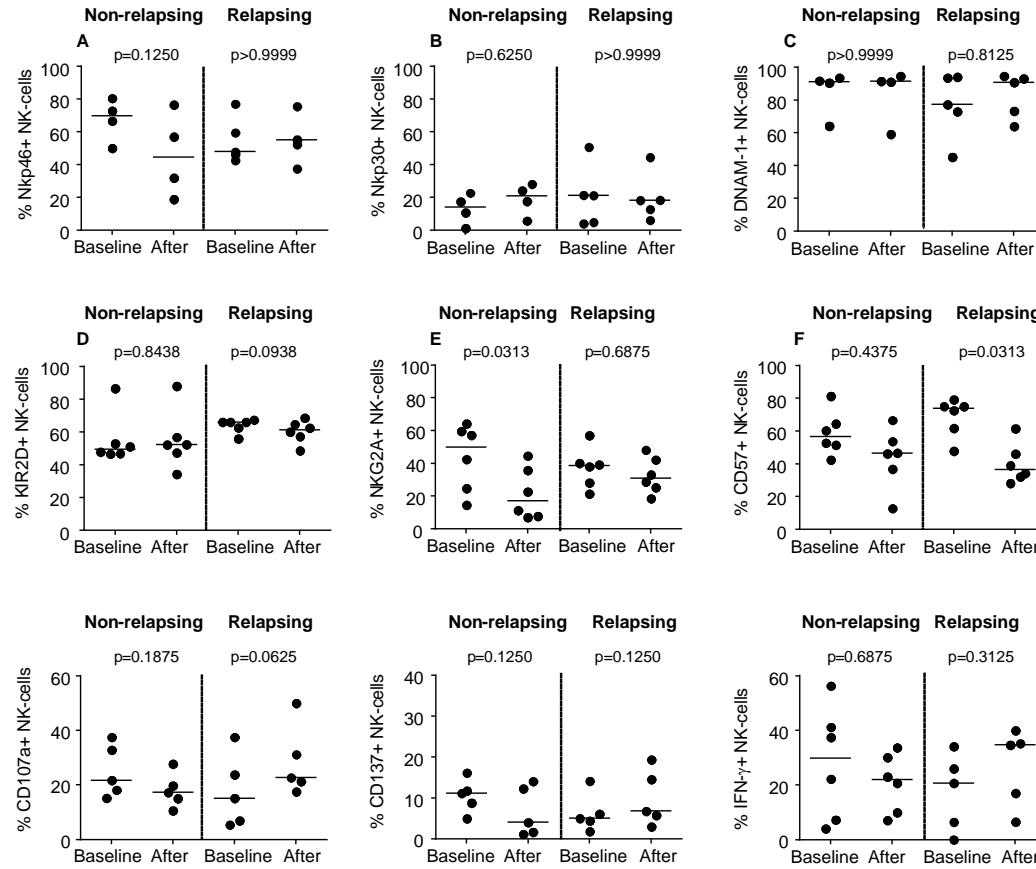

Supplement: 2017.165001.REA_SUPPL.pdf [file 2017.165001.REA_SUPPL.pdf]
